# Supplementary material
Source: PubMed Central journal article supplement (PMC9482346)
Supplement: joces-135-260227-s1.pdf [file joces-135-260227-s1.pdf]

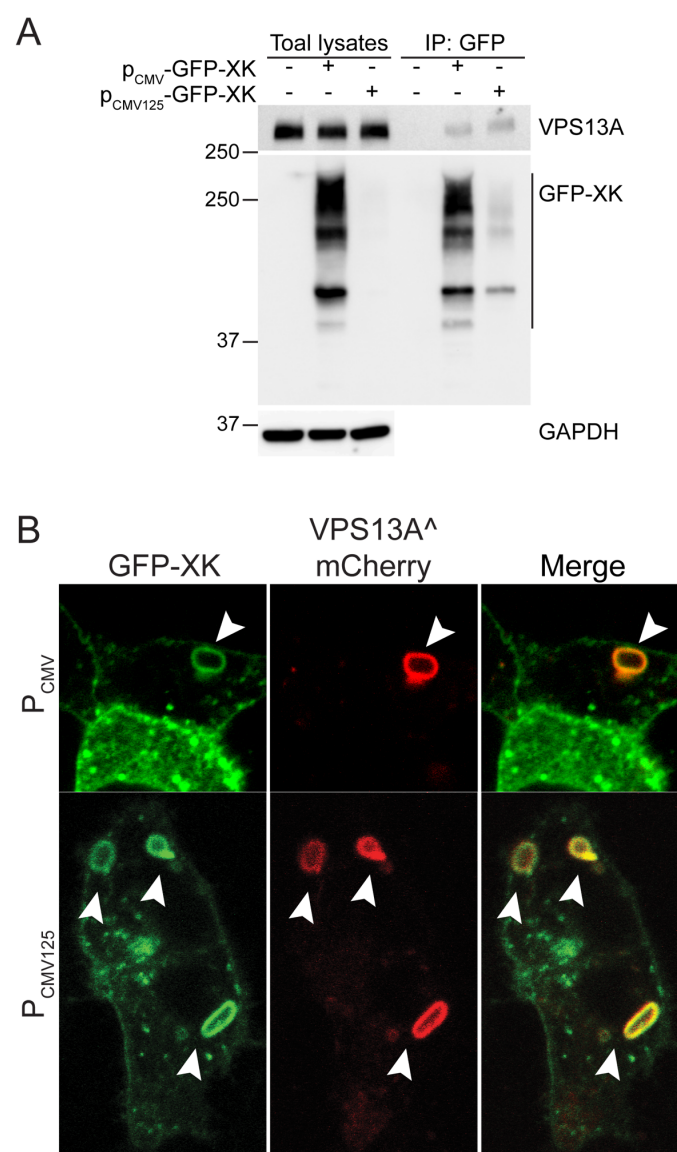

**Fig. S1. Interaction of XK with VPS13A at reduced expression levels.** (A) Co-immunoprecipitation of endogenous VPS13A protein with GFP-XK from HEK293T cells transfected with plasmid pcDNA3.1(+)-N-eGFP-XK, expressing GFP-XK under control of the full CMV promoter, or pJS163 with GFP-XK under control of a smaller 125bp fragment of the CMV promoter. GAPDH was used as a loading control. The experiment was performed three separate times. (B) HEK293T cells were co-transfected with pVPS13A<sup>Δ</sup>mCherry and either pcDNA3.1(+)-N-eGFP-XK or pJS163 and then imaged by fluorescence microscopy. Arrowheads indicate co-localization of VPS13A with GFP-XK. These structures were seen at both GFP-XK expression levels. This experiment was performed twice with each GFP-XK vector.

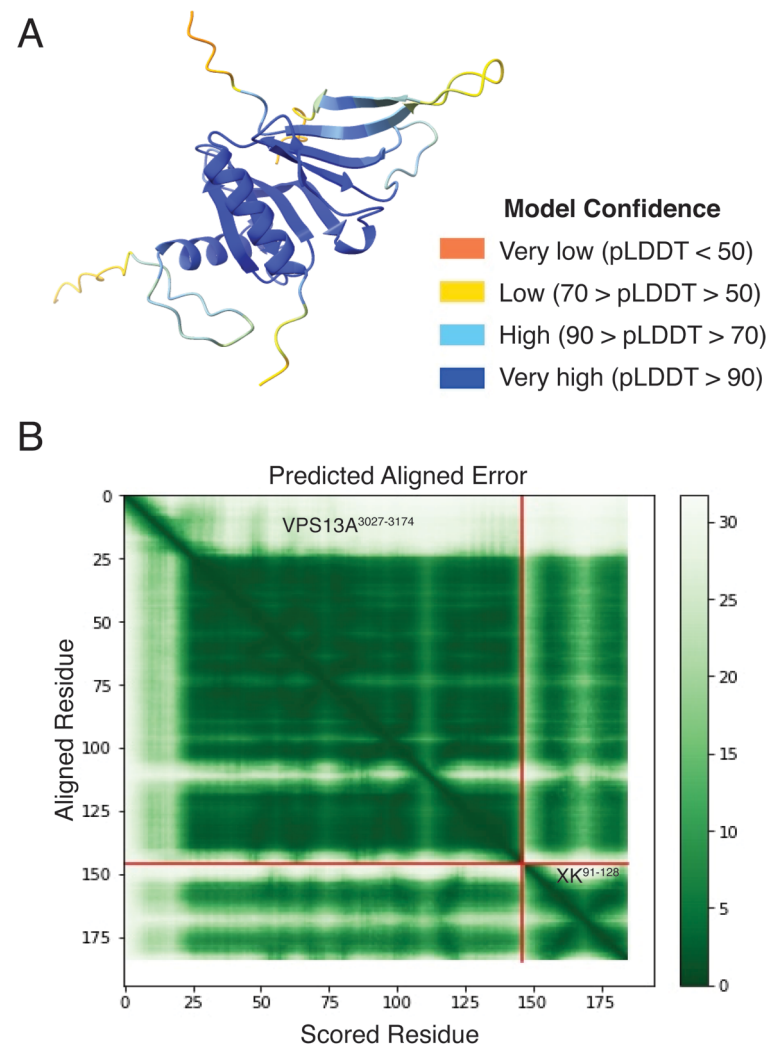

**Fig. S2. Confidence values for the AlphaFold structure of the VPS13A-XK interface shown in Figure 5A.** (A) Structural model, oriented as in Figure 5A color coded to indicate the Local Distance Test score at each position. Darker color indicates higher confidence. (B) The Predicted Aligned Error plot for the structure in Figure 5A.

**Table S1. Plasmids used in this study**

| Name                                 | Gene expressed                                       | Source                     |
|--------------------------------------|------------------------------------------------------|----------------------------|
| pEGFP-C2                             | <i>GFP</i>                                           | Clontech                   |
| pcDNA3.1(+)-N-eGFP- <i>XK</i>        | <i>GFP-XK</i>                                        | GenScript                  |
| p <i>VPS13A</i> <sup>Δ</sup> mCherry | <i>VPS13A</i> <sup>Δ</sup> mCherry                   | Kumar <i>et al.</i> , 2018 |
| JS141-E4                             | <i>VPS13A</i> <sup>W2460R</sup> <sup>Δ</sup> mCherry | (Park and Neiman, 2020)    |
| JS142-D3                             | <i>mRFP-XK</i>                                       | this study                 |
| JS160                                | <i>VPS13A</i> <sup>1-3143</sup> <sup>Δ</sup> mCherry | this study                 |
| JS163                                | <i>GFP-XK</i>                                        | this study                 |
| JS164                                | <i>GFP-VPS13A</i> <sup>2751-3174</sup>               | this study                 |
| JS165                                | <i>GFP-XK</i> <sup>EEPYVS to 6A</sup>                | this study                 |
| JS166                                | <i>GFP-VPS13A</i> <sup>3027-3174</sup>               | this study                 |
| JS167                                | <i>GFP-VPS13A</i> <sup>3144-3174</sup>               | this study                 |
| JS169                                | <i>XK</i>                                            | this study                 |
| JS171                                | <i>GFP-VPS13A</i> <sup>3027-3143</sup>               | this study                 |
| JS172                                | <i>GFP-VPS13A</i> <sup>3027-31784</sup> -I3148P      | this study                 |
| JS173                                | <i>XK</i> <sup>EEPYVS to 6A</sup>                    | this study                 |

**Table S2. primers used in this study**

| Name   | Sequence                                                              |
|--------|-----------------------------------------------------------------------|
| JSO620 | 5'-AGACCCAAGCTGGCTAGCGTTTAACTTAAGCTTGCCACCATGGCCTCCTCCGAGGACGT        |
| JSO628 | 5'-GCCGGGAATTCATAAGATATCTGCAGAATTCGGATCCGAGCTCGGTACCGGCGCCGGTGGAGTGGC |
| JSO731 | 5'-GTTTGTGGAAGGAATGGCACTAGGACTTAAGGCACTAGTTGGTGG                      |
| JSO732 | 5'-ATTATGATCTAGAGTCGCGGCCGCTTCATCTGGCATGAAATACAGACTTCACT              |
| JSO733 | 5'-AGTGAAGTCTGTATTTTCATGCCAGATGAAGCGGCCGCGACTCTAGATCATAAT             |
| JSO734 | 5'-AAATATTAACGCTTACAATTTACGCCTTAAGATACATTGATGAGT                      |
| JSO741 | 5'-GCTTCGCGATGTACGGGCCAGATATACGCGTAAATGGCCCGCCTGGCAT                  |
| JSO742 | 5'-CATGGTGGCAAGCTTAAGTTTAAACGCTAGCCAGCTTGGGTCTCCCTATAG                |
| JSO756 | 5'-CGAGCTGTACAAGTCCGGCCGACTCAGATCTCGAGCGAATATAAAACAGCCTCATTAG         |
| JSO757 | 5'-ATTATGATCAGTTATCTAGATCCGGTGGATCCCGGGTCAGAGGCTCGGAGAAGG             |
| JSO758 | 5'-GGACGAGCTGTACAAGGGT                                                |
| JSO759 | 5'-TTGGCATTTCCTCTTCTTGGTGATAGCGGCAGCAGCCGCTGCATTGTTGCCTGACTGAAAGTAG   |
| JSO760 | 5'-CTACTTTCAGTCAGGCAACAATGCAGCGGCTGCTGCCGCTATCACCAAGAAGAGGCAAATGCCAA  |
| JSO761 | 5'-GCACAGTCGAGGCTGATCA                                                |
| JSO775 | 5'-CGAGCTGTACAAGTCCGGCCGACTCAGATCTCGAGCGCTACAGAGACTTCTGAAGT           |
| JSO776 | 5'-CGAGCTGTACAAGTCCGGCCGACTCAGATCTCGAGCGAGTTTGGAAAAATAATTAAGTTC       |
| JSO781 | 5'-ATTATGATCAGTTATCTAGATCCGGTGGATCCCGGGTCATCTGGCATGAAATACAGACT        |
| JSO783 | 5'-CATCCTCTGGGGTCTTGAAGTTAATTGGTTTTCCAAAC                             |
| JSO784 | 5'-ATTCATGCCAGAGAGTTTGGAAAACCAATTAAGTTC                               |
